# Supplementary figures and images for: Enhanced persistent properties of Mn2+ activated CaZnOS
Source: Royal Society of Chemistry journal article supplement (doi:10.1039/c7ra05861f), 2017-01-01

First Derivative of Absorption

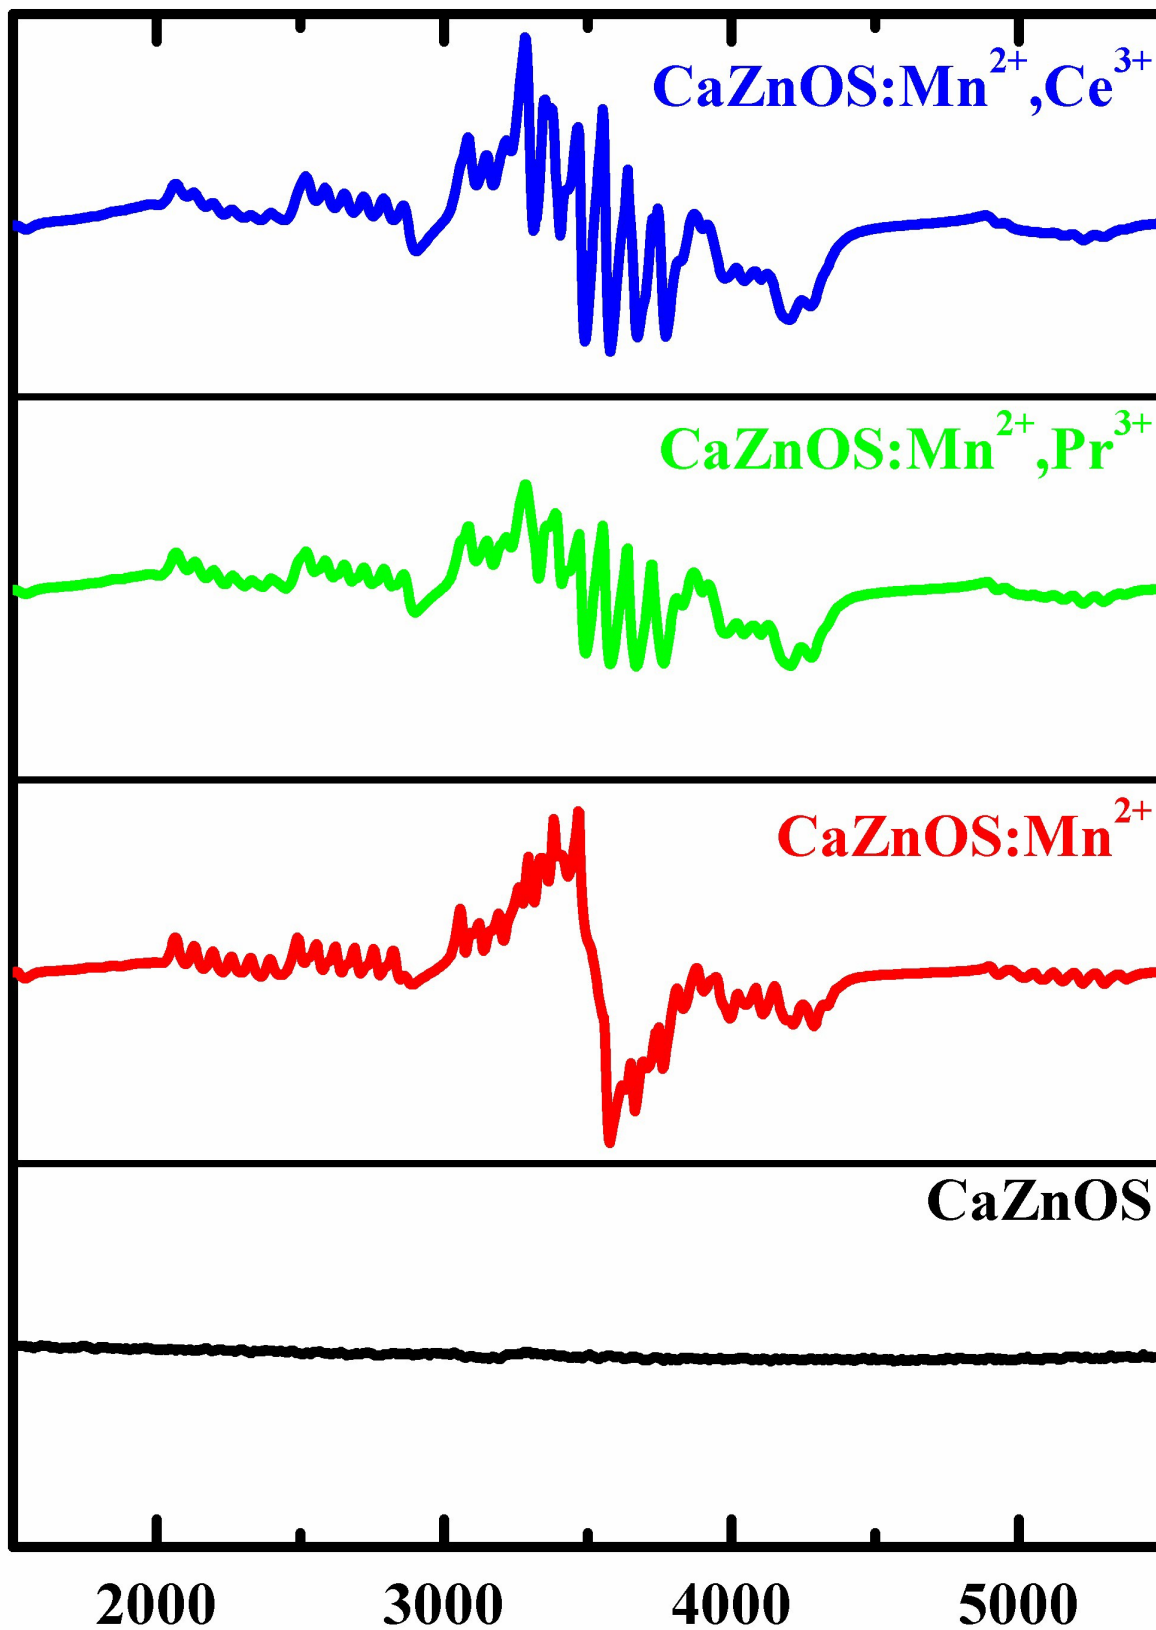

Supplement: c7ra05861f2.pdf [file c7ra05861f2.pdf]
